# Supplementary material for: A well-fabricated Ru@C material derived from Ru/Zn-MOF with high activity and stability in the hydrogenation of 4-chloronitrobenzene
Source: Royal Society of Chemistry journal article supplement (doi:10.1039/d2cp05986j), 2023-01-01
Supplement: d2cp05986j1.pdf [file d2cp05986j1.pdf]

## Supporting Information

# Well-fabricated Ru@C material derived from Ru/Zn-MOF derived with high activity and stability in hydrogenated of 4-chloronitrobenzene

*Zijian Wang,<sup>a</sup> Jiaxin Zhang,<sup>a</sup> Lele Yan,<sup>a</sup> Bo Zhao,<sup>a</sup> Lin Zheng,<sup>a</sup> Haoran Guo,<sup>a</sup> Yue*

*Yuxue,<sup>b</sup> Deman Han,<sup>a</sup> Xianlang Chen <sup>\*a</sup> and Rongrong Li <sup>\*a</sup>*

<sup>a</sup>Engineering Research Center of Recycling & Comprehensive Utilization of Pharmaceutical and Chemical Waste of Zhejiang Province, Taizhou University, Taizhou 318000, Zhejiang, China

<sup>b</sup>Institute of Industrial Catalysis, Zhejiang University of Technology, Hangzhou, 310014, China

\*Corresponding authors: [chenxianlangaini@163.com](mailto:chenxianlangaini@163.com) & [lrr@tzc.edu.cn](mailto:lrr@tzc.edu.cn)

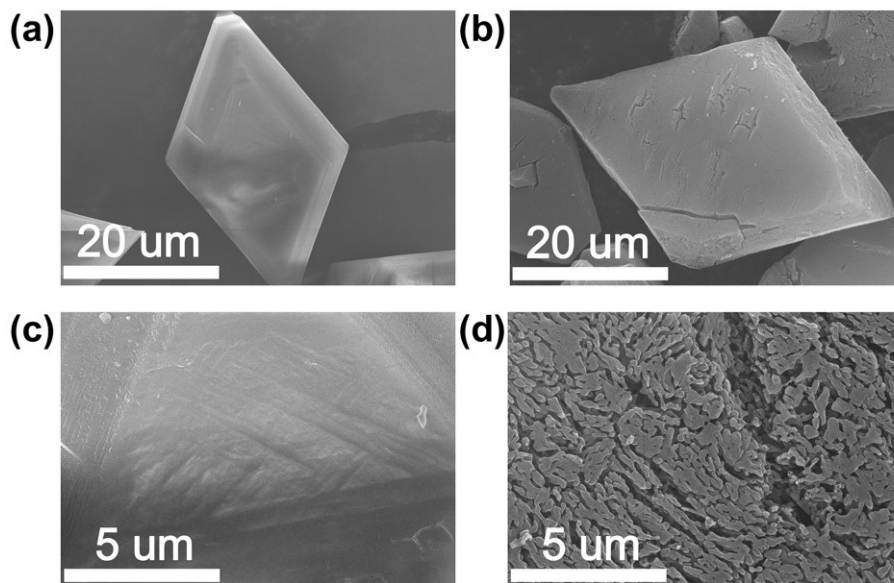

**Fig. S1** SEM images of (a, c) Zn-MOF, (b, d) and C.

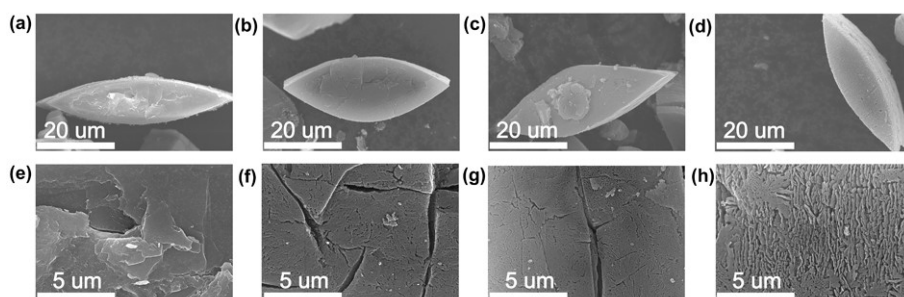

**Fig. S2** SEM images of (a, e) Ru/Zn-MOF, (b, f) Ru@C-1, (c, g) Ru@C-2 (d, h) and Ru@C-3.

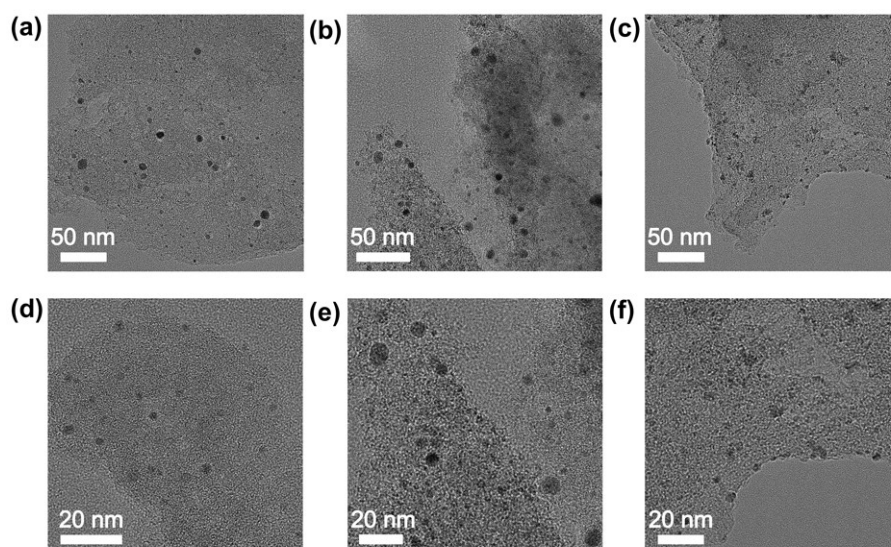

**Fig. S3** TEM images of (a, d) Ru@C-1 (b, e) Ru@C-3 (c, f) Ru/C.

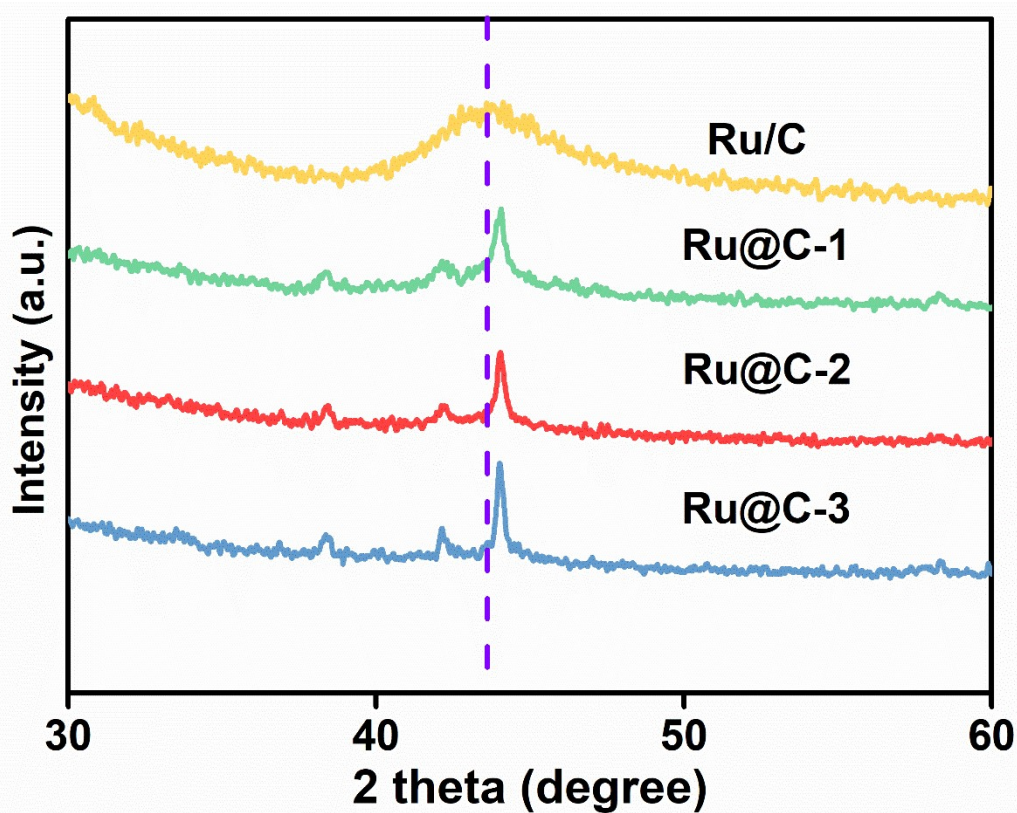

**Fig. S4** XRD patterns of Ru/C, Ru@C-1, Ru@C-2 and Ru@C-3 in the angular range ( $2\theta$ ) from 30 to 60°.

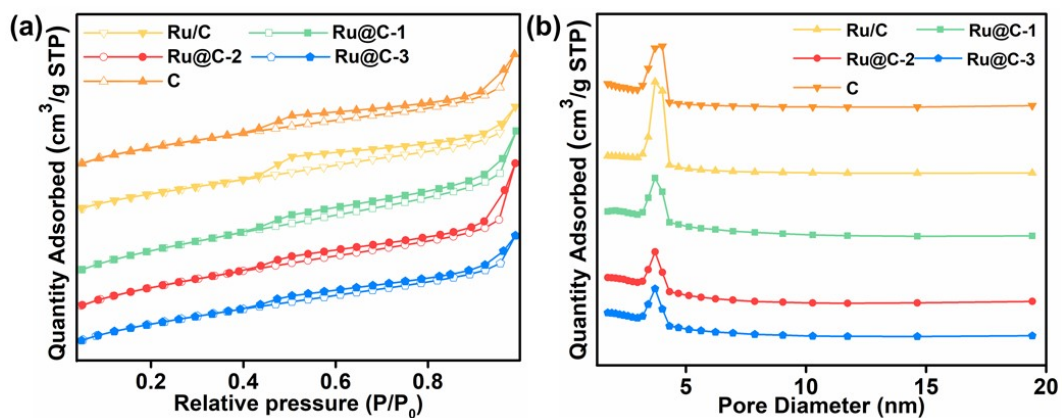

**Fig. S5** (a) N<sub>2</sub> adsorption-desorption isotherms analysis showing catalysts possess a mesoporous structure. (b) BJH pore size distribution verifies the mesoporous characteristics of the samples.

**Table S1** Specific surface area and pore structure results of a series of catalysts.

| Catalyst | BET (m <sup>2</sup> /g) | Vp (cm <sup>3</sup> /g) |
|----------|-------------------------|-------------------------|
| C        | 1155.5                  | 0.97                    |
| Ru@C-1   | 1108.7                  | 1.06                    |
| Ru@C-2   | 1057.4                  | 1.07                    |
| Ru@C-3   | 1010.4                  | 0.88                    |
| Ru/C     | 1008.9                  | 0.87                    |

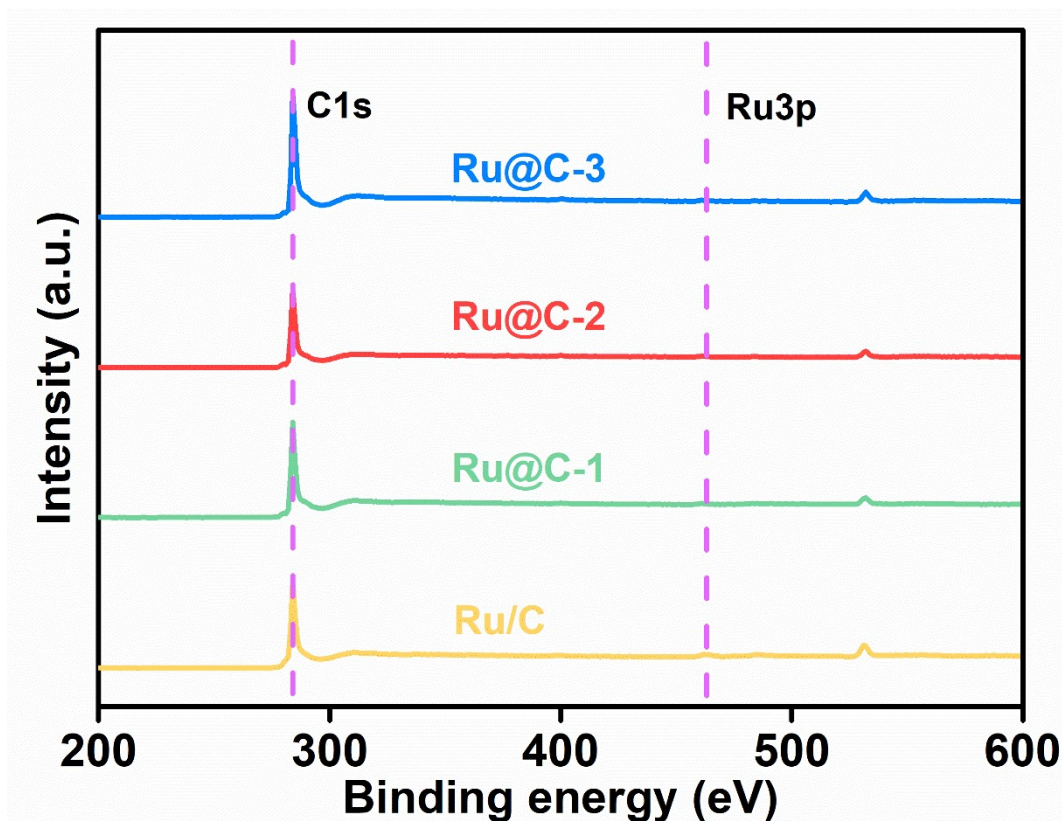

Fig. S6 XPS high-resolution spectra the surface compositions of catalysts.

**Table S2** Element analysis results of the samples with different content of XPS.

| Sample | Ru (wt%) <sup>a</sup> | C (wt%) <sup>a</sup> | Ru (wt%) <sup>b</sup> |
|--------|-----------------------|----------------------|-----------------------|
| Ru/C   | 5.03                  | 94.97                | 4.92                  |
| Ru@C-1 | 1.40                  | 98.60                | 1.48                  |
| Ru@C-2 | 1.78                  | 98.22                | 1.75                  |
| Ru@C-3 | 3.50                  | 96.50                | 3.39                  |

<sup>a</sup>The element content of XPS. <sup>b</sup>The element content of ICP.

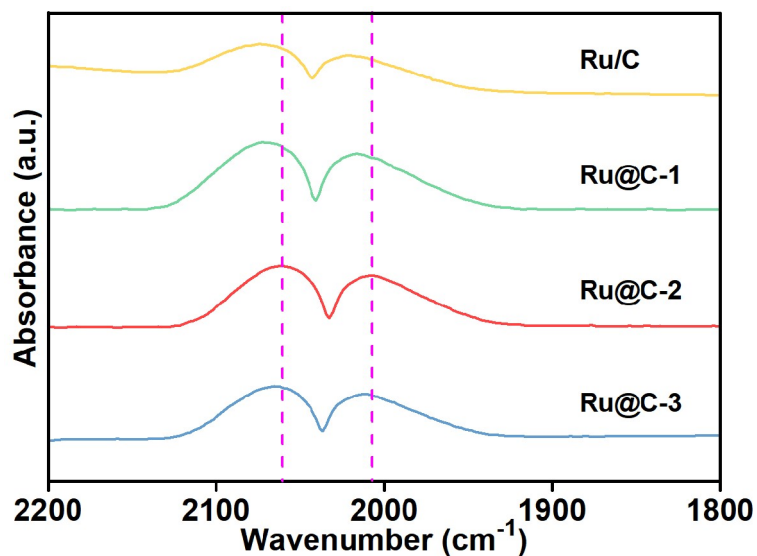

**Fig. S7** In situ DRIFT spectra of CO adsorption on Ru@C-1, Ru@C-2, Ru@C-3 and Ru/C.

**Table S3** Comparison of Catalytic Performance of Different Catalysts for the Hydrogenation of 4-CNB

| Catalyst                                  | $W_{\text{cat}}$<br>(g) | $n_{\text{p-CNB}}$<br>(mmol) | T<br>(°C) | Pressure<br>(bar) | Time<br>(min) | Conv.<br>(%) | Sel.<br>(%) | References |
|-------------------------------------------|-------------------------|------------------------------|-----------|-------------------|---------------|--------------|-------------|------------|
| <b>0.5PdCo-red</b>                        | 0.01                    | 3.3                          | 100       | 40                | 180           | 100.0        | 98.0        | 1          |
| <b>Ru/CN</b>                              | 0.01                    | 2                            | 80        | 20                | 90            | 100.0        | 100.0       | 2          |
| <b>Pd-Ni-B/C</b>                          | 0.05                    | 3.2                          | 110       | 30                | 240           | 98.6         | 94.6        | 3          |
| <b>Ru@CNT</b>                             | 0.01                    | 2.4                          | 100       | 20                | 180           | 90.0         | 99.7        | 4          |
| <b>PtCu/CNT</b>                           | 0.01                    | 4                            | 120       | 15                | 325           | 99.9         | 99.1        | 5          |
| <b>Ru5/NPC (NB)</b>                       | 0.01                    | 1                            | 140       | 15                | 150           | 98.0         | 98.0        | 6          |
| <b>Ru-Fe<sub>3</sub>O<sub>4</sub>/FLG</b> | 0.1                     | 2.5                          | 60        | 30                | 180           | 100.0        | 94.0        | 7          |
| <b>Ru/RGO</b>                             | 0.005                   | 1                            | 60        | 30                | 120           | 100.0        | 96.0        | 8          |
| <b>Ru@C-2</b>                             | 0.01                    | 0.5                          | 60        | 10                | 60            | 99.9         | 99.9        | this work  |

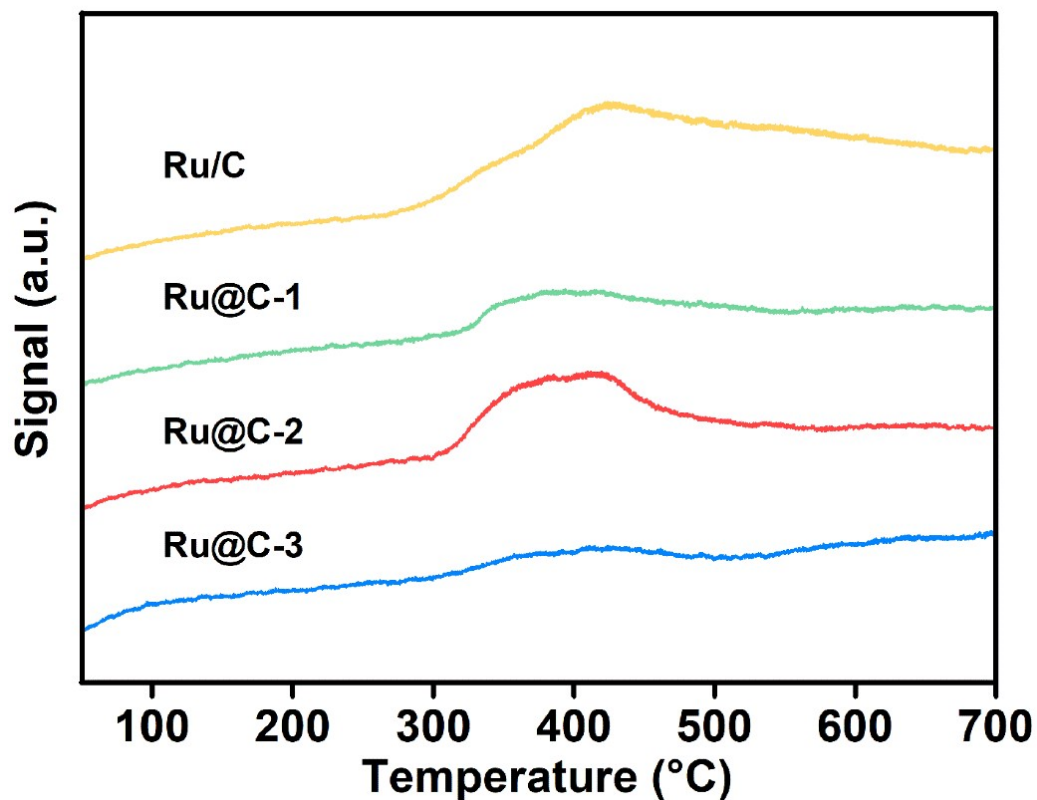

Fig. S8 H<sub>2</sub>-TPD profiles of Ru/C, Ru@C-1, Ru@C-2 and Ru@C-3.

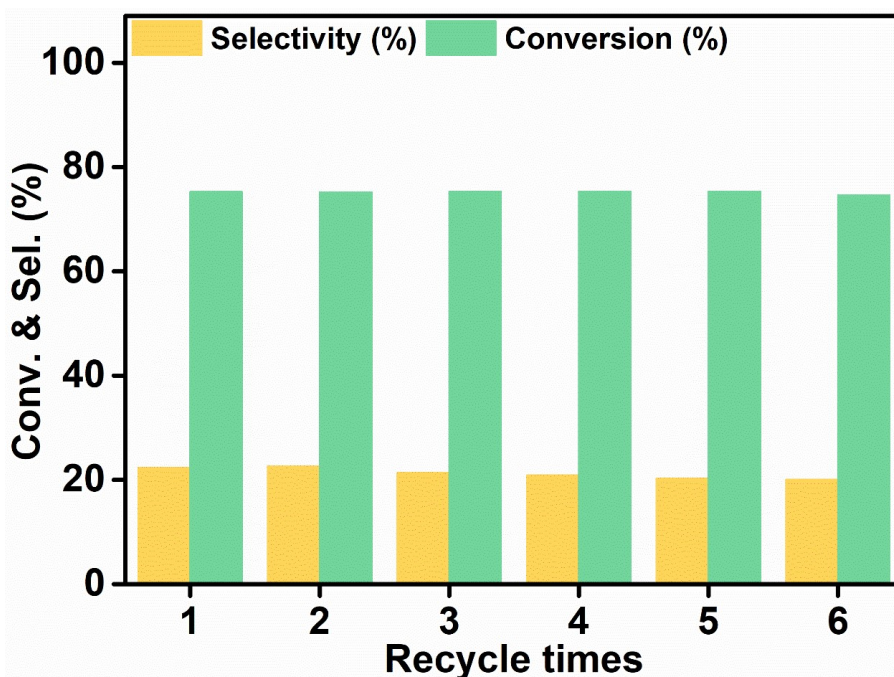

Fig. S9 Reusable of Ru@C-2 catalyst in the hydrogenation of 4-CNB to 4-CAN. Reaction conditions: catalyst, 10 mg; 4-CNB 79 mg, solvent, ethanol (1 ml); temperature, 20 °C; hydrogen pressure, 1 MPa, time, 60min.

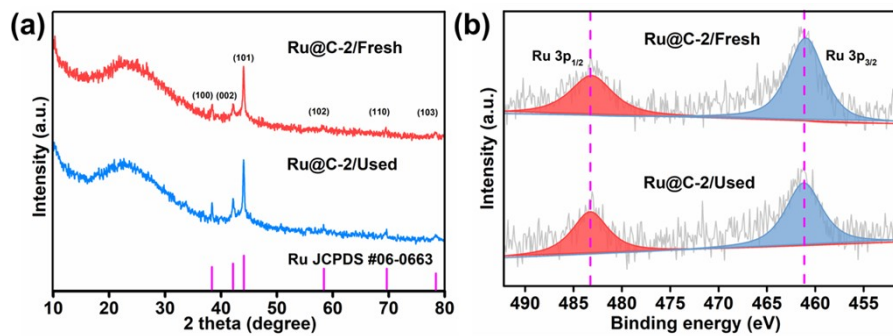

**Fig. S10** (a) XRD and (b) XPS spectra of new catalysts and catalysts reused.

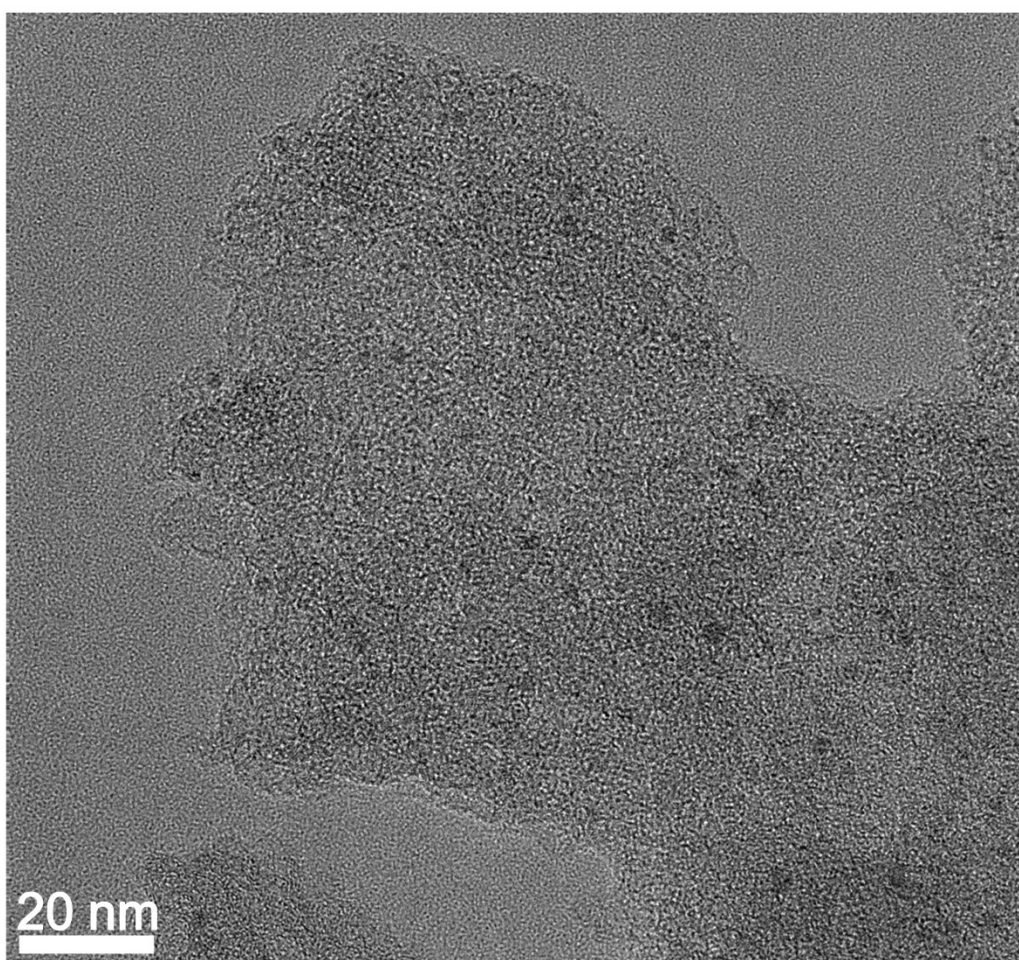

**Fig. S11** TEM images of Ru@C-2 reused.



## REFERENCES

1. T. M. Bustamante, C. H. Campos, M. A. Fraga, J. L. G. Fierro and G. Pecchi, *J. Catal.*, 2020, **385**, 224-237.
2. S. N. Yue, X. G. Wang, S. T. Li, Y. Sheng, X. J. Zou, X. G. Lu and C. L. Zhang, *New J. Chem.*, 2020, **44**, 11861-11869.
3. T. Chen, D. Li, H. Jiang and C. Xiong, *Chem. Eng. J.*, 2015, **259**, 161-169.
4. X. Ge, H. Liu, X. Ding, Y. Liu, X. Li, X. Wu and B. Li, *Nanomaterials*, 2022, **12**, 539.
5. N. Mahata, O. S. G. P. Soares, I. Rodríguez-Ramos, M. F. R. Pereira, J. J. M. Órfão and J. L. Figueiredo, *Applied Catalysis A: General*, 2013, **464-465**, 28-34.
6. X. L. Li, S. L. Zhao, W. Zhang, Y. S. Liu and R. Li, *Dalton Transactions*, 2016, **45**, 15595-15602.
7. Elisa, Bertolucci, Revathi, Bacsa, Anas, Benyounes, Anna, M., Raspolli-Galletti and M., *Chemcatchem*, 2015, **7**, 2971 – 2978.
8. G.-Y. Fan and W.-J. Huang, *Chin. Chem. Lett.*, 2014, **25**, 359-363.
